# Supplementary material for: Survivin contributes to DNA repair by homologous recombination in breast cancer cells
Source: PubMed Central journal article supplement — Breast Cancer Res Treat. 2015 Dec 18;155:53–63. doi: 10.1007/s10549-015-3657-z (PMC4705120; doi:10.1007/s10549-015-3657-z), 2015-12-18

# Supplementary Figure 1

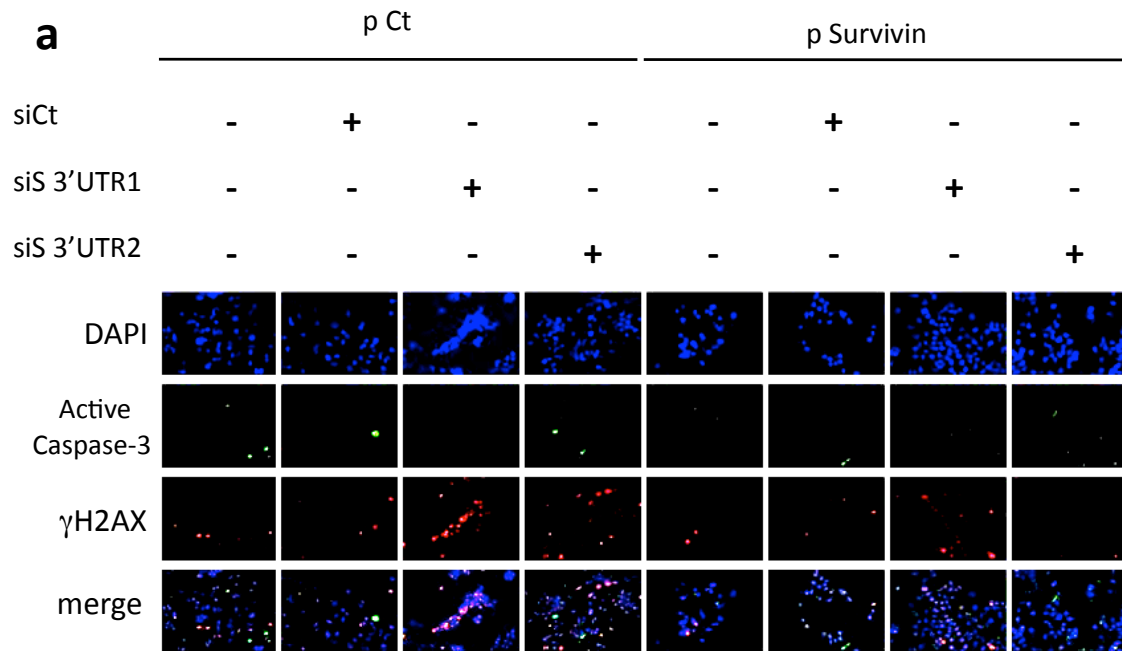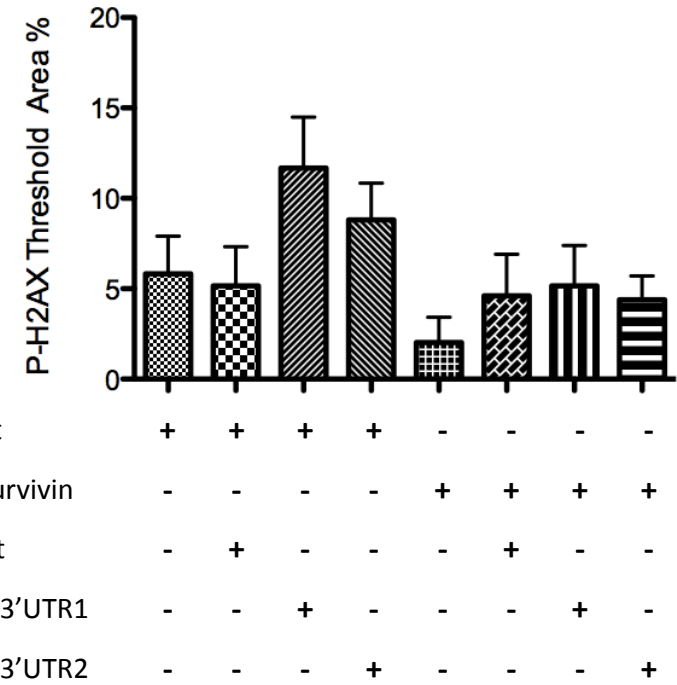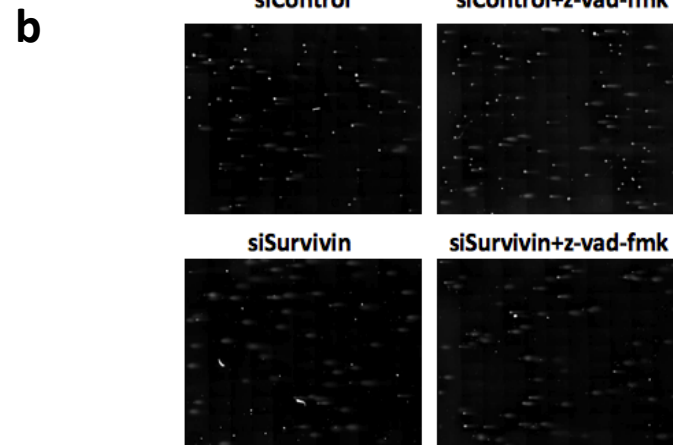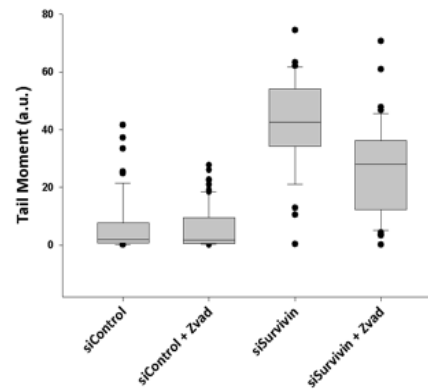

## Supplementary Figure 2

a

| Correlation table |    | Parameters | EME1     | EXO1     | BLM      | RAD51    | BRCA1    | MUS81    |
|-------------------|----|------------|----------|----------|----------|----------|----------|----------|
| BIRC5             | r  |            | 0.47     | 0.55     | 0.51     | 0.44     | 0.28     | 0.08     |
| BIRC5             | p  |            | < 0.0001 | < 0.0001 | < 0.0001 | < 0.0001 | < 0.0001 | < 0.0001 |
| BIRC5             | No |            | 2484     | 5510     | 5263     | 5609     | 4752     | 4982     |
| EME1              | r  |            |          | 0.40     | 0.46     | 0.36     | 0.26     | 0.07     |
| EME1              | p  |            |          | < 0.0001 | < 0.0001 | < 0.0001 | < 0.0001 | 0.0008   |
| EME1              | No |            |          | 2484     | 2484     | 2484     | 2313     | 2484     |
| EXO1              | r  |            |          |          | 0.51     | 0.45     | 0.26     | 0.05     |
| EXO1              | p  |            |          |          | < 0.0001 | < 0.0001 | < 0.0001 | 0.0001   |
| EXO1              | No |            |          |          | 5164     | 5510     | 4653     | 4982     |
| BLM               | r  |            |          |          |          | 0.43     | 0.22     | 0.17     |
| BLM               | p  |            |          |          |          | < 0.0001 | < 0.0001 | < 0.0001 |
| BLM               | No |            |          |          |          | 5263     | 4752     | 4636     |
| RAD51             | r  |            |          |          |          |          | 0.23     | 0.07     |
| RAD51             | p  |            |          |          |          |          | < 0.0001 | < 0.0001 |
| RAD51             | No |            |          |          |          |          | 4752     | 4982     |
| BRCA1             | r  |            |          |          |          |          |          | 0.02     |
| BRCA1             | p  |            |          |          |          |          |          | 0.1170   |
| BRCA1             | No |            |          |          |          |          |          | 4125     |

b

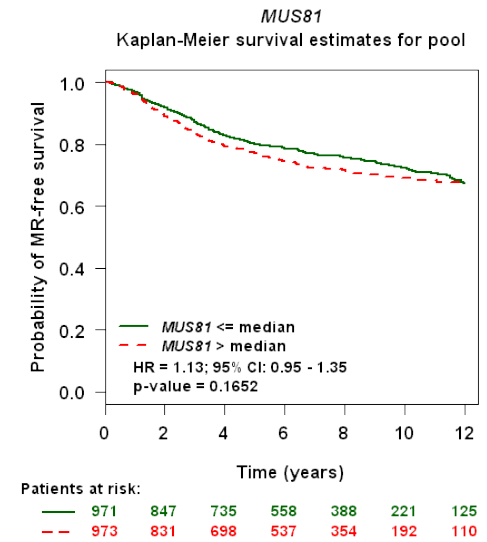

Supplement: 10549_2015_3657_MOESM2_ESM.pdf [file 10549_2015_3657_MOESM2_ESM.pdf]
